# Supplementary material for: SafePsych: improving patient safety by delivering high-impact simulation training on rare and complex scenarios in psychiatry
Source: HighWire-hosted journal article supplement (doi:10.1136/bmjoq-2021-001533), 2021-09-01
Supplement: bmjoq-2021-001533supp001_data_supplement.pdf [file bmjoq-2021-001533supp001_data_supplement.pdf]

## Appendix 1

### Feedback survey

We would be very grateful if you could provide some information about the workshop. It will take less than 5 minutes to complete. Your feedback will help us to improve the quality of the programme.

| Questions                                                            | Strongly disagree | Disagree | Neutral | Agree | Strongly agree |
|----------------------------------------------------------------------|-------------------|----------|---------|-------|----------------|
| I enjoyed the workshop.                                              | 1                 | 2        | 3       | 4     | 5              |
| The workshop was well organized.                                     | 1                 | 2        | 3       | 4     | 5              |
| The facilitators were helpful and approachable.                      | 1                 | 2        | 3       | 4     | 5              |
| I understood the content as presented in the workshop.               | 1                 | 2        | 3       | 4     | 5              |
| The workshop was useful in addressing my needs.                      | 1                 | 2        | 3       | 4     | 5              |
| The workshop improved my ability to use skills related to the topic. | 1                 | 2        | 3       | 4     | 5              |
| The knowledge and skills I learned will be useful to me in my job.   | 1                 | 2        | 3       | 4     | 5              |

| Free-text questions                                                                 |
|-------------------------------------------------------------------------------------|
| What did you like about the workshop?                                               |
| What did you least like about the workshop?                                         |
| What elements from the workshop could you implement in your own practice?           |
| Any comments about the use of the online platform in the delivery of this teaching? |
| How could we improve this workshop for future iterations?                           |
| What other workshops would you like to see offered?                                 |
| Please share any other comments you may have.                                       |
